# Supplementary material for: MicroRNA-210 regulates the metabolic and inflammatory status of primary human astrocytes
Source: PubMed Central journal article supplement (PMC8740343; doi:10.1186/s12974-021-02373-y), 2022-01-06
Supplement: 12974_2021_2373_MOESM1_ESM.pdf [file 12974_2021_2373_MOESM1_ESM.pdf]

| miR- | WM CT Value Mean | GM CT Value Mean |
|------|------------------|------------------|
| 34a  | 28.72            | 28.50            |
| 210  | 32.85            | 31.70            |
| 214  | 35.82            | 35.99            |
| 338  | 25.16            | 24.99            |
| 146b | 33.49            | 32.42            |
| 365  | 30.73            | 30.35            |
| 145  | 28.83            | 28.31            |
| 320  | 31.50            | 30.83            |
| 29a  | 32.50            | 32.39            |
| 29b  | 32.57            | 32.73            |
| 124a | 31.33            | 31.33            |
| 181a | 31.43            | 30.97            |
| 99a  | 29.10            | 28.35            |
| 449  | 27.13            | 27.47            |
| 146a | 30.24            | 29.59            |
| 155  | 33.49            | 33.70            |
| 100  | 29.32            | 27.34            |
| 21   | 32.41            | 31.88            |

| Legend |                 |
|--------|-----------------|
| miR    | microRNA        |
| CT     | Cycle Threshold |
| WM     | White Matter    |
| GM     | Gray Matter     |
