# Supplementary material for: MicroRNA-210 regulates the metabolic and inflammatory status of primary human astrocytes
Source: PubMed Central journal article supplement (PMC8740343; doi:10.1186/s12974-021-02373-y), 2022-01-06

A

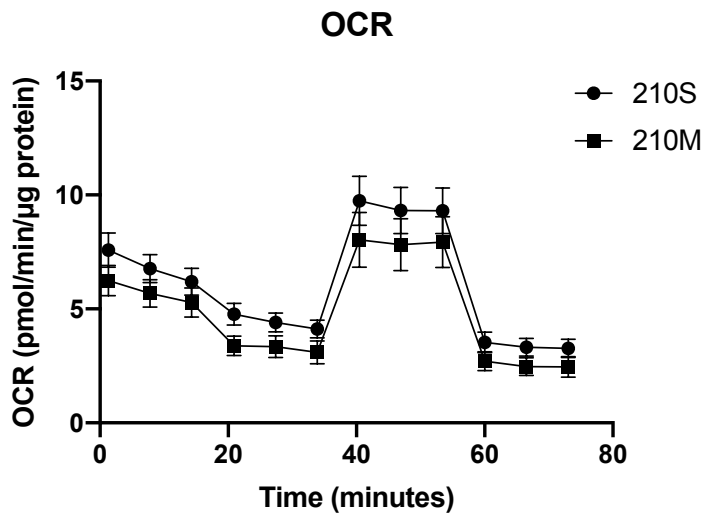

B

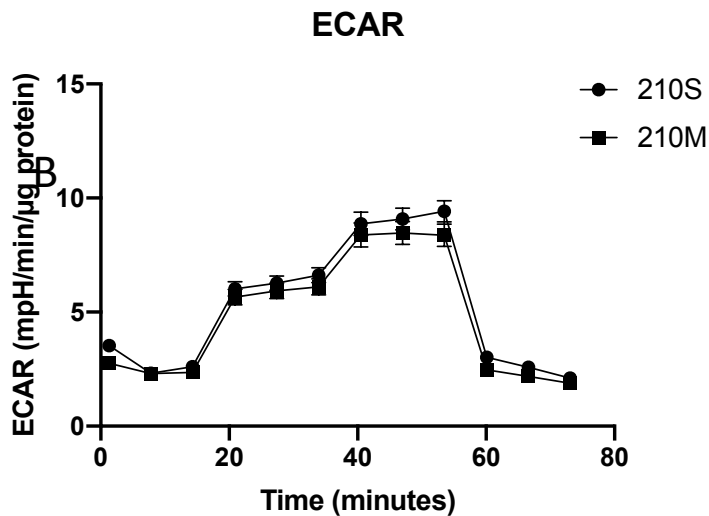

C

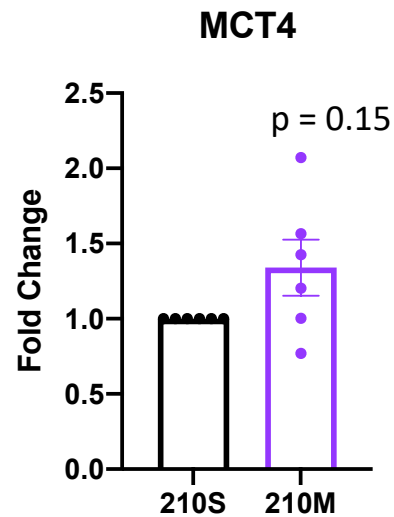

D

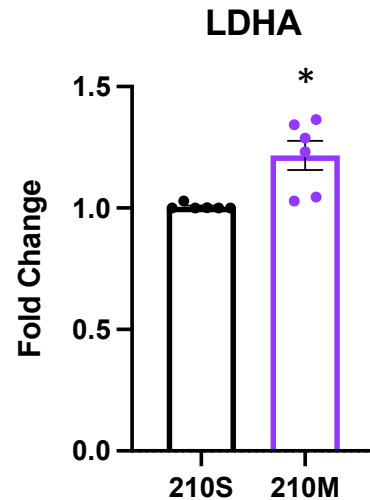

Supplement: 12974_2021_2373_MOESM5_ESM.pdf [file 12974_2021_2373_MOESM5_ESM.pdf]
